# Supplementary material for: Characterization of the gila monster (Heloderma suspectum suspectum) venom proteome
Source: PubMed Central journal article supplement (PMC4510068; doi:10.1016/j.dib.2015.01.007), 2015-02-13
Supplement: mmc1.pdf [file mmc1.pdf]

**Table 1:**

| Spot # | Accession Nr     | Organism                    | Protein Name                                          | Mass kDa | Score -10lgP |
|--------|------------------|-----------------------------|-------------------------------------------------------|----------|--------------|
| 1      | gi 190700985     | Heloderma suspectum cinctum | Hyaluronidase toxin                                   | 16,195   | 178.91       |
| 2      | gi 190700985     | Heloderma suspectum cinctum | Hyaluronidase toxin                                   | 16,195   | 173.68       |
|        | gi 558142188     | Pelodiscus sinensis         | PREDICTED: neuroendocrine convertase 1 isoform X3     | 69,928   | 104.45       |
| 3      | gi 637260392     | Anolis carolinensis         | PREDICTED: neuroendocrine convertase 1                | 83,573   | 236.67       |
|        | gi 190700985     | Heloderma suspectum cinctum | Hyaluronidase toxin                                   | 16,195   | 147.21       |
|        | P80003           | Heloderma suspectum         | Acidic phospholipase A2 PA4                           | 15,640   | 106.89       |
|        | C6EVG7           | Heloderma suspectum cinctum | Natriuretic and helokinestatin peptides               | 19,672   | 88.40        |
| 4      | gi 637304799     | Anolis carolinensis         | PREDICTED: semaphorin-3E isoform X2                   | 89,508   | 241.25       |
| 5      | gi 637304799     | Anolis carolinensis         | PREDICTED: semaphorin-3E isoform X2                   | 89,508   | 176.53       |
| 6      | gi 637381731     | Anolis carolinensis         | PREDICTED: LOW QUALITY PROTEIN: myeloperoxidase-like  | 80,855   | 139.54       |
| 7      | gi 637270817     | Anolis carolinensis         | PREDICTED: hepatocyte growth factor-like protein      | 80,320   | 227.65       |
| 8      | gi 190700987     | Heloderma suspectum cinctum | Kallikrein toxin 1                                    | 28,229   | 144.63       |
|        | gi 449280893     | Columba livia               | Ovochymase-2, partial                                 | 26,050   | 86.33        |
| 9      | gi 637304803     | Anolis carolinensis         | PREDICTED: semaphorin-3E isoform X2                   | 82,875   | 159.24       |
| 10     | gi 47604946      | Gallus gallus               | Thymosin, beta 4                                      | 5,181    | 123.32       |
|        | gi 449278384     | Columba livia               | Glyceraldehyde-3-phosphate dehydrogenase, partial     | 34,982   | 114.24       |
| 11     | gi 432585        | Heloderma horridum          | Gilatoxin=kallikrein-like serine protease             | 26,845   | 139.18       |
| 12     | gi 432585        | Heloderma horridum          | Gilatoxin=kallikrein-like serine protease             | 26,845   | 109.89       |
| 13     | gi 432585        | Heloderma horridum          | Gilatoxin=kallikrein-like serine protease             | 26,845   | 331.01       |
|        | P80003           | Heloderma suspectum         | Acidic phospholipase A2 PA4                           | 15,640   | 126.93       |
|        | gi 558133676     | Pelodiscus sinensis         | PREDICTED: kallikrein-11-like                         | 25,956   | 118.77       |
|        | gi 300872907     | Celestus warreni            | Kallikrein-Cwar3                                      | 26,815   | 83.33        |
| 14     | gi 432585        | Heloderma horridum          | Gilatoxin=kallikrein-like serine protease             | 26,845   | 280.78       |
|        | gi 300872907     | Celestus warreni            | Kallikrein-Cwar3                                      | 26,815   | 117.63       |
|        | gi 558133676     | Pelodiscus sinensis         | PREDICTED: kallikrein-11-like                         | 25,956   | 112.37       |
| 15     | gi 432585        | Heloderma horridum          | Gilatoxin=kallikrein-like serine protease             | 26,845   | 343.38       |
|        | gi 300872907     | Celestus warreni            | Kallikrein-Cwar3                                      | 26,815   | 125.50       |
|        | gi 558133676     | Pelodiscus sinensis         | PREDICTED: kallikrein-11-like                         | 25,956   | 122.81       |
| 16     | gi 432585        | Heloderma horridum          | Gilatoxin=kallikrein-like serine protease             | 26,845   | 205.52       |
|        | gi 300872907     | Celestus warreni            | Kallikrein-Cwar3                                      | 26,815   | 143.45       |
|        | gi 387014304     | Crotalus adamanteus         | 14-3-3 protein sigma                                  | 27,929   | 126.41       |
|        | C6EVG7           | Heloderma suspectum cinctum | Natriuretic and helokinestatin peptides               | 19,672   | 123.53       |
|        | P80003           | Heloderma suspectum         | Acidic phospholipase A2 PA4                           | 15,640   | 121.53       |
| 17     | gi 327268290     | Anolis carolinensis         | PREDICTED: peroxiredoxin-4                            | 30,492   | 99.84        |
| 18     | gi 591387951     | Chelonia mydas              | PREDICTED: phosphatidylethanolamine-binding protein 4 | 23,679   | 121.06       |
|        | gi 537459604     | Micrurus fulvius            | Phosphatidylethanolamine-binding protein 4            | 23,247   | 92.50        |
| 19     | gi 300872895-Mod | Gerrhonotus infernalis      | Kallikrein-Ginf2                                      | 27,247   | 283.57       |
| 20     | C6EVG7           | Heloderma suspectum cinctum | Natriuretic and helokinestatin peptides               | 19,672   | 101.62       |
| 21     | gi 300872907-Mod | Celestus warreni            | Kallikrein-Cwar3                                      | 26,923   | 217.88       |
|        | gi 300872895-Mod | Gerrhonotus infernalis      | Kallikrein-Ginf2                                      | 27,247   | 134.81       |
| 22     | gi 190700979     | Heloderma suspectum cinctum | CRISP toxin                                           | 27,512   | 264.38       |
| 23     | D2X5W4           | Heloderma suspectum cinctum | Helofensin-3                                          | 19,456   | 253.69       |
| 24     | P80003           | Heloderma suspectum         | Acidic phospholipase A2 PA4                           | 16,696   | 143.14       |
| 25     | gi 432585        | Heloderma horridum          | Gilatoxin=kallikrein-like serine protease             | 26,845   | 120.10       |
|        | P80003           | Heloderma suspectum         | Acidic phospholipase A2 PA4                           | 16,696   | 113.26       |
| 26     | gi 432585        | Heloderma horridum          | Gilatoxin=kallikrein-like serine protease             | 26,845   | 83.12        |
| 27     | gi 190700997     | Heloderma suspectum cinctum | Type III phospholipase A2 toxin 1                     | 16,696   | 181.56       |
|        | gi 530578376     | Chrysemys picta bellii      | PREDICTED: rho GDP-dissociation inhibitor 1           | 23,234   | 114.92       |
|        | gi 602668510     | Python bivittatus           | PREDICTED: semaphorin-3E-like, partial                | 72,042   | 104.52       |
| 28     | gi 151176139     | Anas platyrhynchos          | Beta-actin                                            | 41,738   | 130.86       |
|        | P80003           | Heloderma suspectum         | Acidic phospholipase A2 PA4                           | 16,696   | 85.54        |
| 29     | gi 602668510     | Python bivittatus           | PREDICTED: semaphorin-3E-like, partial                | 72,042   | 166.44       |
|        | P80003           | Heloderma suspectum         | Acidic phospholipase A2 PA4                           | 16,696   | 164.96       |
|        | gi 432585        | Heloderma horridum          | Gilatoxin=kallikrein-like serine protease             | 26,845   | 99.70        |
| 30     | gi 190700997     | Heloderma suspectum cinctum | Type III phospholipase A2 toxin 1                     | 16,696   | 227.19       |
|        | gi 637304803     | Anolis carolinensis         | PREDICTED: semaphorin-3E isoform X2                   | 82,875   | 182.88       |
|        | gi 432585        | Heloderma horridum          | Gilatoxin=kallikrein-like serine protease             | 26,845   | 89.37        |
| 31     | gi 190700997     | Heloderma suspectum cinctum | Type III phospholipase A2 toxin 1                     | 16,696   | 192.26       |
|        | gi 637304803     | Anolis carolinensis         | PREDICTED: semaphorin-3E isoform X2                   | 82,875   | 122.46       |
|        | gi 432585        | Heloderma horridum          | Gilatoxin=kallikrein-like serine protease             | 26,845   | 75.80        |

|    |                  |                             |                                                       |        |        |
|----|------------------|-----------------------------|-------------------------------------------------------|--------|--------|
| 32 | gi 190700997     | Heloderma suspectum cinctum | Type III phospholipase A2 toxin 1                     | 16,696 | 216.92 |
|    | gi 637304803     | Anolis carolinensis         | PREDICTED: semaphorin-3E isoform X2                   | 82,875 | 126.00 |
|    | C6EVG7           | Heloderma suspectum cinctum | Natriuretic and helokinestatin peptides               | 19,672 | 99.17  |
|    | gi 432585        | Heloderma horridum          | Gilatoxin=kallikrein-like serine protease             | 26,845 | 71.88  |
| 33 | gi 530582705     | Chrysemys picta bellii      | PREDICTED: phosphatidylethanolamine-binding protein 4 | 23,679 | 115.95 |
| 34 | D2X5W4           | Heloderma suspectum cinctum | Helofensin-3                                          | 19,456 | 302.55 |
|    | P80003           | Heloderma suspectum         | Acidic phospholipase A2 PA4                           | 16,696 | 81.42  |
| 35 | P16354           | Heloderma suspectum         | Phospholipase A2 isozymes PA3A/PA3B/PA5               | 16,048 | 426.56 |
|    | gi 190700999     | Heloderma suspectum cinctum | Type III phospholipase A2 toxin 2                     | 18,034 | 365.53 |
|    | C6EVG7           | Heloderma suspectum cinctum | Natriuretic and helokinestatin peptides               | 19,672 | 105.43 |
| 36 | P16354           | Heloderma suspectum         | Phospholipase A2 isozymes PA3A/PA3B/PA5               | 16,048 | 417.89 |
|    | C6EVG7           | Heloderma suspectum cinctum | Natriuretic and helokinestatin peptides               | 19,672 | 139.44 |
| 37 | gi 190700997     | Heloderma suspectum cinctum | Type III phospholipase A2 toxin 1                     | 16,696 | 385.56 |
|    | C6EVG7           | Heloderma suspectum cinctum | Natriuretic and helokinestatin peptides               | 19,672 | 163.49 |
| 38 | gi 190700997     | Heloderma suspectum cinctum | Type III phospholipase A2 toxin 1                     | 16,696 | 298.36 |
|    | C6EVG7           | Heloderma suspectum cinctum | Natriuretic and helokinestatin peptides               | 19,672 | 92.40  |
| 39 | P80003           | Heloderma suspectum         | Acidic phospholipase A2 PA4                           | 16,696 | 332.93 |
|    | C6EVG7           | Heloderma suspectum cinctum | Natriuretic and helokinestatin peptides               | 19,672 | 86.98  |
| 40 | P80003           | Heloderma suspectum         | Acidic phospholipase A2 PA4                           | 16,696 | 286.28 |
|    | C6EVG7           | Heloderma suspectum cinctum | Natriuretic and helokinestatin peptides               | 19,672 | 144.55 |
| 41 | P80003           | Heloderma suspectum         | Acidic phospholipase A2 PA4                           | 16,696 | 370.82 |
| 42 | P80003           | Heloderma suspectum         | Acidic phospholipase A2 PA4                           | 16,696 | 183.45 |
|    | C6EVG7           | Heloderma suspectum cinctum | Natriuretic and helokinestatin peptides               | 19,672 | 127.03 |
| 43 | P80003           | Heloderma suspectum         | Acidic phospholipase A2 PA4                           | 16,696 | 232.86 |
|    | gi 432585        | Heloderma horridum          | Gilatoxin=kallikrein-like serine protease             | 26,845 | 86.06  |
| 44 | P80003           | Heloderma suspectum         | Acidic phospholipase A2 PA4                           | 16,696 | 197.99 |
|    | C6EVG7           | Heloderma suspectum cinctum | Natriuretic and helokinestatin peptides               | 19,672 | 124.58 |
| 45 | P80003           | Heloderma suspectum         | Acidic phospholipase A2 PA4                           | 16,696 | 87.93  |
| 46 | gi 190700997     | Heloderma suspectum cinctum | Type III phospholipase A2 toxin 1                     | 16,696 | 164.37 |
|    | gi 602627628     | Python bivittatus           | PREDICTED: myelomonocytic growth factor-like          | 27,726 | 77.90  |
| 47 | gi 190700997     | Heloderma suspectum cinctum | Type III phospholipase A2 toxin 1                     | 16,696 | 157.93 |
|    | Q3HXY8           | Pseudonaja textilis         | Venom nerve growth factor 2                           | 27,472 | 108.62 |
| 48 | gi 408385878     | Abronia graminea            | VEGF-Abr-1                                            | 22,330 | 175.37 |
|    | P16354           | Heloderma suspectum         | Phospholipase A2 isozymes PA3A/PA3B/PA5               | 16,048 | 139.73 |
| 49 | P80003           | Heloderma suspectum         | Acidic phospholipase A2 PA4                           | 16,696 | 101.92 |
|    | C6EVG7           | Heloderma suspectum cinctum | Natriuretic and helokinestatin peptides               | 19,672 | 97.42  |
|    | gi 408385878     | Abronia graminea            | VEGF-Abr-1                                            | 22,330 | 71.86  |
| 50 | gi 190700997     | Heloderma suspectum cinctum | Type III phospholipase A2 toxin 1                     | 16,696 | 171.09 |
| 51 | P80003           | Heloderma suspectum         | Acidic phospholipase A2 PA4                           | 16,696 | 151.51 |
| 52 | P80003           | Heloderma suspectum         | Acidic phospholipase A2 PA4                           | 16,696 | 101.01 |
| 53 | P80003           | Heloderma suspectum         | Acidic phospholipase A2 PA4                           | 16,696 | 186.30 |
|    | P04204           | Heloderma suspectum         | Exendin-2-long                                        | 9,531  | 60.83  |
| 54 | gi 408385876-Mod | Abronia graminea            | PLA2-Abr-1                                            | 36,784 | 460.12 |
|    | P04204           | Heloderma suspectum         | Exendin-2-long                                        | 9,531  | 165.16 |
| 55 | P04204           | Heloderma suspectum         | Exendin-2-long                                        | 9,531  | 160.82 |
| 56 | C6EVG1           | Heloderma suspectum cinctum | Exendin-4                                             | 9,479  | 190.00 |
|    | P16354           | Heloderma suspectum         | Phospholipase A2 isozymes PA3A/PA3B/PA5               | 16,048 | 183.31 |
|    | P20394           | Heloderma horridum          | Exendin-3                                             | 9,481  | 147.31 |
| 57 | P04204           | Heloderma suspectum         | Exendin-2-long                                        | 9,531  | 165.16 |
|    | P80003           | Heloderma suspectum         | Acidic phospholipase A2 PA4                           | 16,696 | 90.54  |
| 58 | gi 248418        | Heloderma suspectum         | Exendin-4                                             | 4,188  | 196.42 |
|    | P20394           | Heloderma horridum          | Exendin-3                                             | 9,481  | 143.91 |
|    | C6EVG7           | Heloderma suspectum cinctum | Natriuretic and helokinestatin peptides               | 19,672 | 138.04 |

**Table 1. The protein composition of the 58 analyzed 2D-gel spots.** The table shows the proteins identified in each of the 58 spots using PEAKS to interrogate a database composed of protein sequences from birds, crocodiles, lizards, snakes and turtles (*sauropsida*) with the obtained LC-MS/MS data. Keratins have been removed from the list. In order to simplify the data, protein groups (based on shared identified peptides) were combined into one hit based on the following criteria: 1) The highest scoring protein hit was kept, except that Swiss-Prot accessions were prioritized over NCBI accessions, and 2) Proteins with three or more unique peptides were not grouped. The full list of identified proteins (without grouping and removal of keratins) has been deposited to the ProteomeXchange Consortium via the PRIDE partner repository with the dataset identifier PXD001343.
