# Supplementary material for: Characterization of the gila monster (Heloderma suspectum suspectum) venom proteome
Source: PubMed Central journal article supplement (PMC4510068; doi:10.1016/j.dib.2015.01.007), 2015-02-13
Supplement: mmc2.pdf [file mmc2.pdf]

**Table 2:**

**Identification of three gila monster venom proteins using de novo sequencing and partial reconstruction of sequences.** The tables and alignments below describe how the protein content of spot 19, 21, and 54 have been identified using an iterative process based on de novo sequencing performed by PEAKS (please see method section for further details). Alignments of the original sequences with the user-modified sequences are included. **The tables include the following footnotes:**

**1:** Peptide sequences with Average Local Confidence (ALC) scores above 90% and Total Local Confidence (TLC) scores above 90%. If the ALC score for a peptide sequence is above 90%, but the TLC score at certain positions is below 90%, the peptide sequence is included in the table and the mass of the unassigned part of the sequence (TLC < 90%) is displayed inside bracket parentheses. The masses displayed in the ordinary parentheses indicate a modification. Sequences shorter than five amino acid residues are not included.

**2:** The parentheses have been removed and sequence-tags N- or C-terminal to the bracket parentheses have been removed unless the tags are five amino acid residues or more.

**3:** Peptide sequences with less than 4 spectral counts have been removed.

**4:** Modified protein sequences were constructed based on the template protein sequences and the obtained de novo peptide sequences, as described in the method section. Here, an alignment of the resulting modified sequences with the original template sequences are shown. The red part of the sequences highlights the part of the modified sequences, which, compared to the template, were changed according to the de novo peptide sequences. Confident mutations suggested by the SPIDER algorithm in PEAKS are displayed in green.

## Spot 19

| Sequences obtained from PEAKS <sup>1</sup> | Cleaned sequences <sup>2</sup> | Spectral counts <sup>3</sup> |
|--------------------------------------------|--------------------------------|------------------------------|
| GPGLYTR                                    | GPGLYTR *                      | 27                           |
| C(+57.02)SVM(+15.99)GWGSLTTSK              | CSVMGWGSLTTSK *                | 16                           |
| LSSPATL[201.1]R                            | LSSPATL                        | 11                           |
| VSAGTM(+15.99)C(+57.02)Y[97.1]DTASTTK      | VSAGTMCY DTASTTK *             | 10                           |
| VVTVSL[97.1]R                              | VVTVSL                         | 9                            |
| DSC(+57.02)PDFTADLM(+15.99)M(+15.99)LK     | DSCPFTADLMMLK *                | 8                            |
| LATVL[87.0]PR                              | LATVL                          | 5                            |
| LSSPATL[114.0]SR                           | LSSPATL                        | 4                            |
| LATVL[184.1]R                              | LATVL                          | 4                            |
| VATVSL[97.1]R                              | VATVSL                         | 4                            |

\* Peptide sequences that align with the homology-based protein hit. These sequences were used to construct the modified protein sequence.

### Alignment<sup>4</sup>

|     |                                                                                                                                  |     |                            |
|-----|----------------------------------------------------------------------------------------------------------------------------------|-----|----------------------------|
| 1   | MEPAKLLALLLLLLLPSLVSAAHKKRILGGKECNEAEHPWLVLVLLYESKPKFCSGILLDRNWV                                                                 | 60  | gi 300872895 gb ADK39260.1 |
| 1   | MEPAKLLALLLLLLLPSLVSAAHKKRILGGKECNEAEHPWLVLVLLYE <b>PK</b> KPKFCSGILLDRNWV<br>*****                                              | 60  | gi 300872895-Modified      |
| 61  | VTAAHCVYSGEIEIRLGLHNRNMPRGDEQMRVSAATLCYPDTASTTQNSCADFTADIMMI                                                                     | 120 | gi 300872895 gb ADK39260.1 |
| 61  | VTAAHCVYSGEIEIRLGLHNRNMPRGDEQMR <b>VSAGTMCY</b> DTASTTK <b>DCP</b> DTADLMML<br>*****:.*:*****:.* ** ** ** **:.*:.*               | 120 | gi 300872895-Modified      |
| 121 | KLNSPVKYSKHIGPLLLPTGSVFGTKCRVMGWGTTTTSEVTFPIVPQCANINILENRVC                                                                      | 180 | gi 300872895 gb ADK39260.1 |
| 121 | <b>K</b> LNSPV <b>K</b> FNKHIGPLLLPTGSVFGTK <b>CSVMGWGSLTTSK</b> VTFPIVPQCANINILENRVC<br>*****:.*:*****:.* ** ** **^:*****:.*:.* | 180 | gi 300872895-Modified      |

```

181 AVAYPSWRMTNDMLCAGDQKGCKDTCQGDSGGPLICGGQLQGIISMGKSPGPGVYTNVNS 240 gi|300872895|gb|ADK39260.1|
181 AVAYPSWRMTNDMLCAGDQKGCKDTCQGDSGGPLICGGQLQGIISMGKSPGPGLYTRVNS 240 gi|300872895-Modified
*****

241 YFNWILEFI 249 gi|300872895|gb|ADK39260.1|
241 YFNWILEFI 249 gi|300872895-Modified
*****

```

## Spot 21

| Sequences obtained from PEAKS <sup>1</sup> | Cleaned sequences <sup>2</sup> | Spectral counts <sup>3</sup> |
|--------------------------------------------|--------------------------------|------------------------------|
| LSAGTM(+15.99)C(+57.02)YPD TAR             | LSAGTMCYPD TAR *               | 13                           |
| LLC(+57.02)AQLK                            | LLCAQLK                        | 7                            |
| LSSPATLDSR                                 | LSSPATLDSR                     | 6                            |
| VTLPNVPHC(+57.02)[287.1]R                  | VTLPNVPHC *                    | 6                            |
| VVTVSL[97.1]R                              | VVTVSL                         | 5                            |
| DWVLTDK                                    | DWVLTDK *                      | 4                            |
| LSSPATLNSR                                 | LSSPATLNSR                     | 4                            |
| LC(+57.02)EM(+15.99)AYK                    | LCEMAYK                        | 4                            |
| LSAGTM(+15.99)C(+57.02)YPDE[71.0]R         | LSAGTMCYPDE *                  | 4                            |
| LSSPATL[201.1]R                            | LSSPATL                        | 4                            |
| LDAGTM(+15.99)C(+57.02)YPD[172.1]R         | LDAGTMCYPD *                   | 4                            |

\* Peptide sequences that align with the homology-based protein hit. These sequences were used to construct the modified protein sequence.

## Alignment<sup>4</sup>

```

1  MEPIKLLAFLPLLLLAFVSAKHKRIVGGQECSEDEHPVLVLFHDSTGPFCSGVLLDHNWVL 60 gi|300872907|gb|ADK39266.1|
1  MEPIKLLAFLPLLLLAFVSAKHKRIVGGQECSEDEHPVLVLFHDSTGPFCSGVLLDHDWVL 60 gi|300872907-Modified
*****

61  TAAHCYERGMQKMLGVHNRNVLRGDEESRVSAARCFDPRGATQNSCEAFTADIMMVK 120 gi|300872907|gb|ADK39266.1|
61  TDKHCYERGMQKMLGVHNRNVLRGDEESRLSAGTMCYPD TARATQNSCEAFTADIMMVK 120 gi|300872907-Modified
* *****:*.:.*.** *****

121  LNSPVKYNKHISLLLLPSASVFGAKCRVMGWSNTVVRTIVPHCVDLTILENRVCTAA 180 gi|300872907|gb|ADK39266.1|
121  LNLSPVKYNKHISLLLLPSASVFGAKCRVMGWSNTVVTLPNVPHCVDLTILENRVCTAA 180 gi|300872907-Modified
** *****

181  LPVLDMSDDDL CAGDPKGCKDSCQGDSSGGLVCDGQLQGIVSRGRSPGPGIYTKVDSYLN 240 gi|300872907|gb|ADK39266.1|
181  LPVLDMSDDDL CAGDPKGCKDSCQGDSSGGLVCDGQLQGIVSRGRSPGPGIYTKVDSYLN 240 gi|300872907-Modified
*****

241  WILEFI 246 gi|300872907|gb|ADK39266.1|
241  WILEFI 246 gi|300872907-Modified
*****

```

## Spot 54

| Sequences obtained from PEAKS <sup>1</sup> | Cleaned sequences <sup>2</sup> | Spectral counts <sup>3</sup> |
|--------------------------------------------|--------------------------------|------------------------------|
| LLAC(+57.02)ALR                            | LLACALR *                      | 146                          |
| FLATLEA[128.1]K                            | FLATLEA *                      | 95                           |
| [128.1]ALVVSAAEK                           | ALVVSAAEK *                    | 84                           |
| AATC(+57.02)D[128.1]R                      | AATCD *                        | 49                           |
| FLATLEAQK                                  | FLATLEAQK *                    | 44                           |
| AATC(+57.02)DQR                            | AATCDQR *                      | 30                           |
| [154.1]GLAPVLVQSVWDANK                     | GLAPVLVQSVWDANK *              | 29                           |
| QALVVSAAEK                                 | QALVVSAAEK *                   | 22                           |
| [128.1]ALVVDAAEK                           | ALVVDAAEK *                    | 18                           |
| VSAAEK                                     | VSAAEK *                       | 17                           |
| FLAELEA[128.1]K                            | FLAELEA *                      | 15                           |
| [128.1]ALVVS[A71.0]E[128.1]                | ALVVS A *                      | 12                           |
| DQPAHTQWYAAT[275.1]QR                      | DQPAHTQWYAAT *                 | 11                           |

|                               |                    |   |
|-------------------------------|--------------------|---|
| FLATLE[199.1]K                | FLATLE *           | 9 |
| [154.1]GLAPVLVQSVWDAG[57.0]K  | GLAPVLVQSVWDAG *   | 9 |
| LVVSAAEK                      | LVVSAAEK *         | 8 |
| YAATC(+57.02)D[128.1]R        | YAATCD *           | 8 |
| [128.1]ALVVSA[71.0]EK         | ALVVSA *           | 7 |
| [340.1]AHTQADYAATC(+57.02)DQR | AHTQADYAATC *      | 6 |
| DQPAHTQADYAAT[275.1]QR        | DQPAHTQADYAAT *    | 6 |
| [154.1]GLAPVLVQSVWDAG[185.1]  | GLAPVLVQSVWDAG *   | 6 |
| LEAQK                         | LEAQK *            | 6 |
| [128.1]ALVVDA[71.0]EK         | ALVVDA *           | 5 |
| [128.1]ALVVSA[328.2]          | ALVVSA *           | 5 |
| ATLEAQK                       | ATLEAQK *          | 5 |
| FLATLEA[256.2]                | FLATLEA *          | 5 |
| LAC(+57.02)ALR                | LACALR *           | 5 |
| DQPAHTQWYAATC(+57.02)DQR      | DQPAHTQWYAATCDQR * | 4 |
| [154.1]GLAPVLVQDVWDANK        | GLAPVLVQDVWDANK *  | 4 |
| LATVL[184.1]R                 | LATVL *            | 4 |

\* Peptide sequences that align with the homology-based protein hit. These sequences were used to construct the modified protein sequence.

#### Alignment<sup>4</sup>

|                                                       |                                                                |     |                                  |
|-------------------------------------------------------|----------------------------------------------------------------|-----|----------------------------------|
| 1                                                     | MLASMASV GALLLAMNALV M PLASGSWSKDTTSSHTIAKGGRRDRGQVLSFLWRRPRGL | 60  | gi   408385876   gb   AFU63217.1 |
| 1                                                     | MLASMASV GALLLAMNALV M PLASGSWSKDTTSSHTIAKGGRRDRGQVLSFLWRRPRGL | 60  | gi   408385876-Modified          |
| *****                                                 |                                                                |     |                                  |
| 61                                                    | PPVLVQSIWDPQGHL LACALRDEPAHTNWYLEAYKQQQALNFSGTELQHYLDLTLEVQNDT | 120 | gi   408385876   gb   AFU63217.1 |
| 61                                                    | APVLVQSVWDAN-KLLACALRDQPAHTQWYAATCDQRQALVVSAAEKQHFLATLEAQKDT   | 119 | gi   408385876-Modified          |
| *****: ** : :*****:****:* : .*:*** .*:* **:* ***.*:** |                                                                |     |                                  |
| 121                                                   | CWGAEYTGEDLDLGVRRTLALEEQEAQETNRIQRGLTMPGTLWCGAGNIASNFSLGTFK    | 180 | gi   408385876   gb   AFU63217.1 |
| 120                                                   | CWGAEYTGEDLDLGVRRTLALEEQEAQETNRIQRGLTMPGTLWCGAGNIASNFSLGTFK    | 179 | gi   408385876-Modified          |
| *****                                                 |                                                                |     |                                  |
| 181                                                   | GPMCCRHDHDCDIQISGLKYNYGVFNFRPHTISHCDCDTRFRNCLMSLSDSIADFIGKT    | 240 | gi   408385876   gb   AFU63217.1 |
| 180                                                   | GPMCCRHDHDCDIQISGLKYNYGVFNFRPHTISHCDCDTRFRNCLMSLSDSIADFIGKT    | 239 | gi   408385876-Modified          |
| *****                                                 |                                                                |     |                                  |
| 241                                                   | YFNVMFVPCFELKEGNACVEWNWYMCNTNYSQMPVAHLVDPSPYVPIGLPTPTLQPGTQS   | 300 | gi   408385876   gb   AFU63217.1 |
| 240                                                   | YFNVMFVPCFELKEGNACVEWNWYMCNTNYSQMPVAHLVDPSPYVPIGLPTPTLQPGTQS   | 299 | gi   408385876-Modified          |
| *****                                                 |                                                                |     |                                  |
| 301                                                   | SQDRKRSQKKWKQLRHAHPNGAGQRRRLGR                                 | 330 | gi   408385876   gb   AFU63217.1 |
| 300                                                   | SQDRKRSQKKWKQLRHAHPNGAGQRRRLGR                                 | 329 | gi   408385876-Modified          |
| *****                                                 |                                                                |     |                                  |
